# Supplementary material for: HDX and Native Mass Spectrometry Reveals the Different Structural Basis for Interaction of the Staphylococcal Pathogenicity Island Repressor Stl with Dimeric and Trimeric Phage dUTPases
Source: PubMed Central journal article supplement (PMC6770826; doi:10.3390/biom9090488), 2019-09-14

## Supplementary Materials

# HDX and native mass spectrometry reveals the different structural basis for interaction of the staphylococcal pathogenicity island repressor StI with dimeric and trimeric phage dUTPases

Kinga Nyíri <sup>1,2,#,\*</sup>, Matthew J. Harris <sup>3,#</sup>, Judit Matejka <sup>1,2</sup>, Olivér Ozohanics <sup>4,5</sup>, Károly Vékey <sup>4</sup>,

Antoni J. Borysik <sup>3,\*</sup>, Beáta G. Vértessy <sup>1,2,\*</sup>

<sup>1</sup> Department of Applied Biotechnology and Food Sciences, Budapest University of Technology and Economics, Budapest, 1111, Hungary

<sup>2</sup> Institute of Enzymology, Research Centre for Natural Sciences, Hungarian Academy of Sciences, Budapest, 1117, Hungary

<sup>3</sup> Department of Chemistry, King's College London, Britannia House, London SE1 1DB, United Kingdom

<sup>4</sup> Institute of Organic Chemistry, Research Centre for Natural Sciences, Hungarian Academy of Sciences, Budapest, 1117, Hungary

<sup>5</sup> Department of Medical Biochemistry, Semmelweis University, Budapest, 1094, Hungary

# These authors contributed equally to this work.

\* Correspondence: knyiri@mail.bme.hu; antoni.borysik@kcl.ac.uk; vertessy@mail.bme.hu

## Supplementary Figures

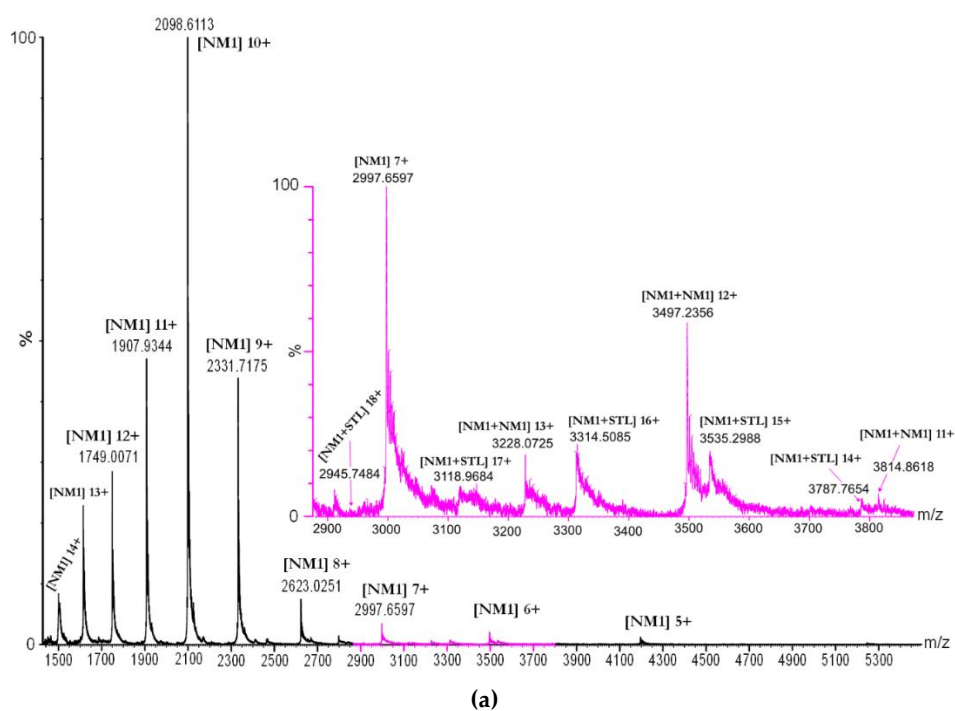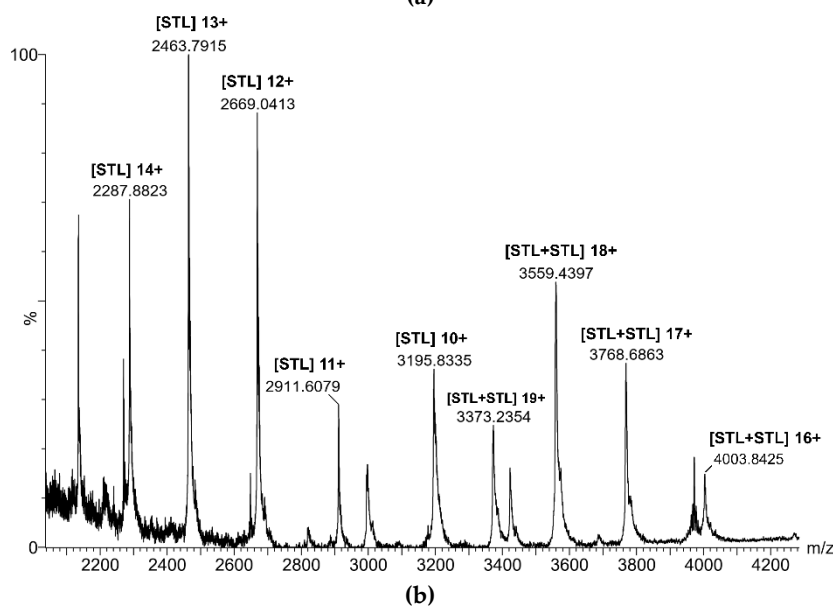

**Figure S1.** Annotated mass spectra of the mixture of the DUT $\phi$ NM1 (NM1) with Stl (STL) protein **(a)** and Stl protein **(b)** measured under native electrospray conditions. **(a)** Main panel annotates the series of peaks corresponding to the DUT $\phi$ NM1 protein. In addition, peaks corresponding to DUT $\phi$ NM1 dimer and those of the complex of Stl with DUT $\phi$ NM1 could also be detected in the spectra, as shown in the inset. In the inset the 2900-3900 m/z region of the spectra is magnified (this segment is shown in violet in the main panel, as well). Inset highlights the peaks corresponding to the heteromer with 53 kDa molar mass, which indicates the presence of a 1:1 Stl - DUT $\phi$ NM1-Stl complex, corresponding to the added molar mass of one DUT $\phi$ NM1 monomer (21 kDa) and one Stl monomer (32 kDa) (cf. also Figure 2d of the main text). **(b)**. Peaks corresponding to Stl dimer (marked as STL+STL) (64 kDa) and monomer (marked as STL) (32 kDa) are annotated.

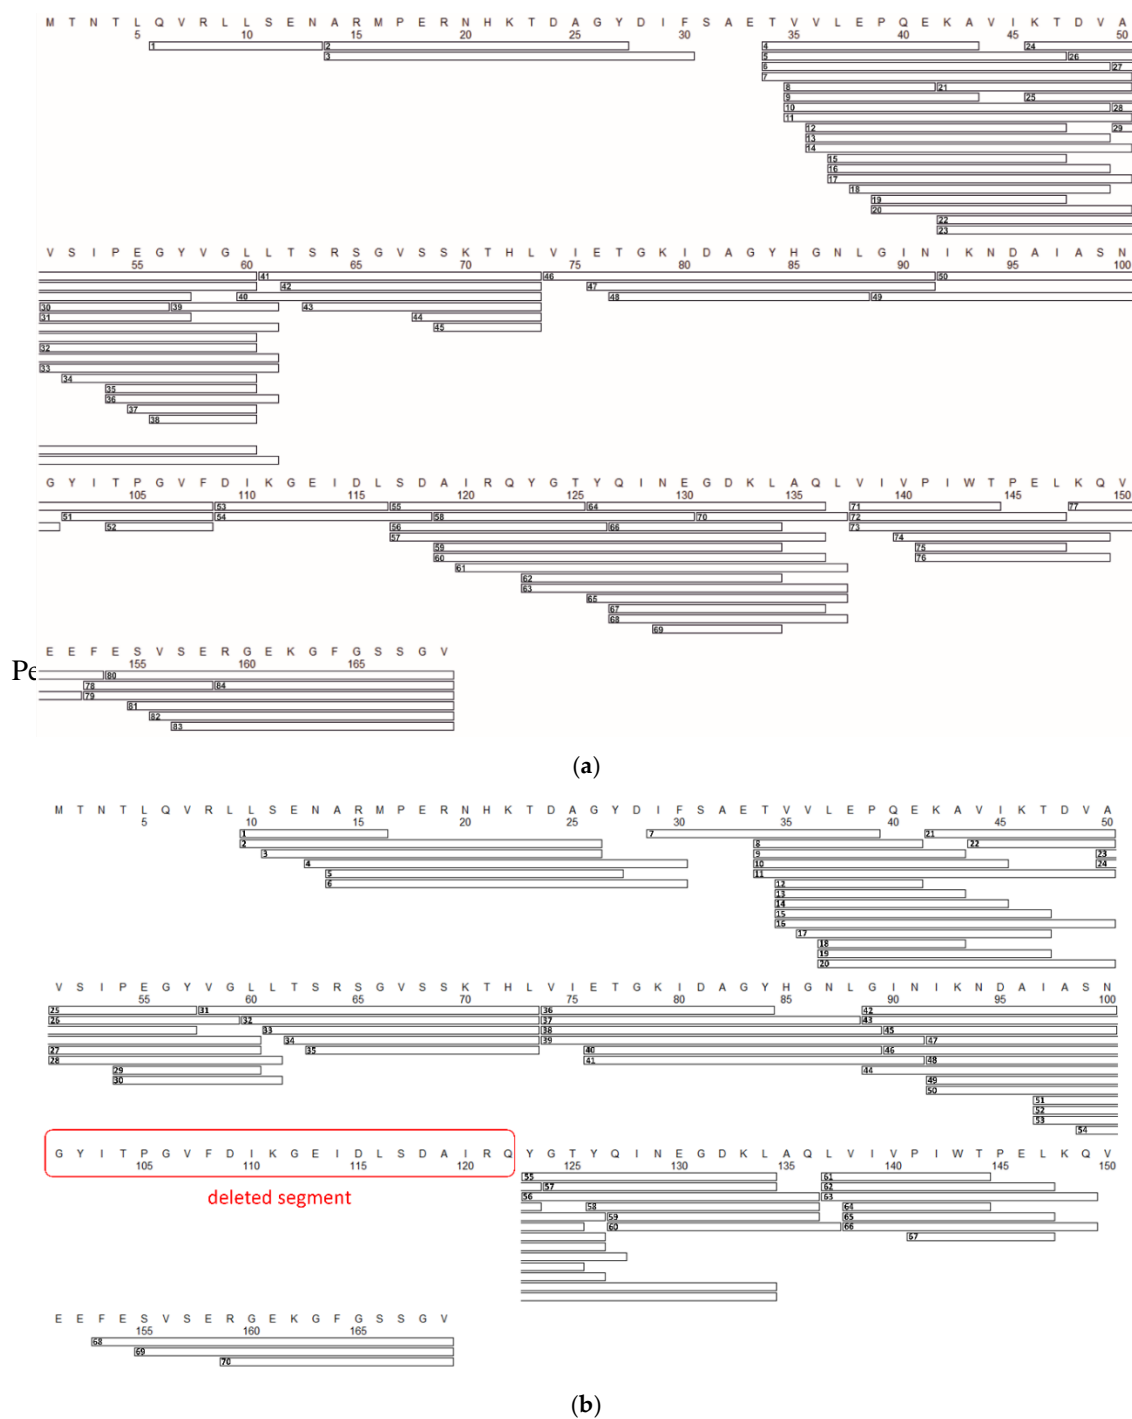

**Figure S2.** Coverage map of HDX-MS difference plots for DUT $\phi$ 11 and DUT $\phi$ 11 $\Delta$ insert upon complex formation with Stl. (a) Coverage map describing the distribution of 84 individual peptides (horizontal bars) covering 95.3% of the DUT $\phi$ 11 sequence with redundancy of 6.0 in the presence of Stl. (b) Coverage map describing the distribution of 70 individual peptides (horizontal bars) covering 92% of the DUT $\phi$ 11 $\Delta$ insert sequence with redundancy of 6.2 in the presence of Stl.

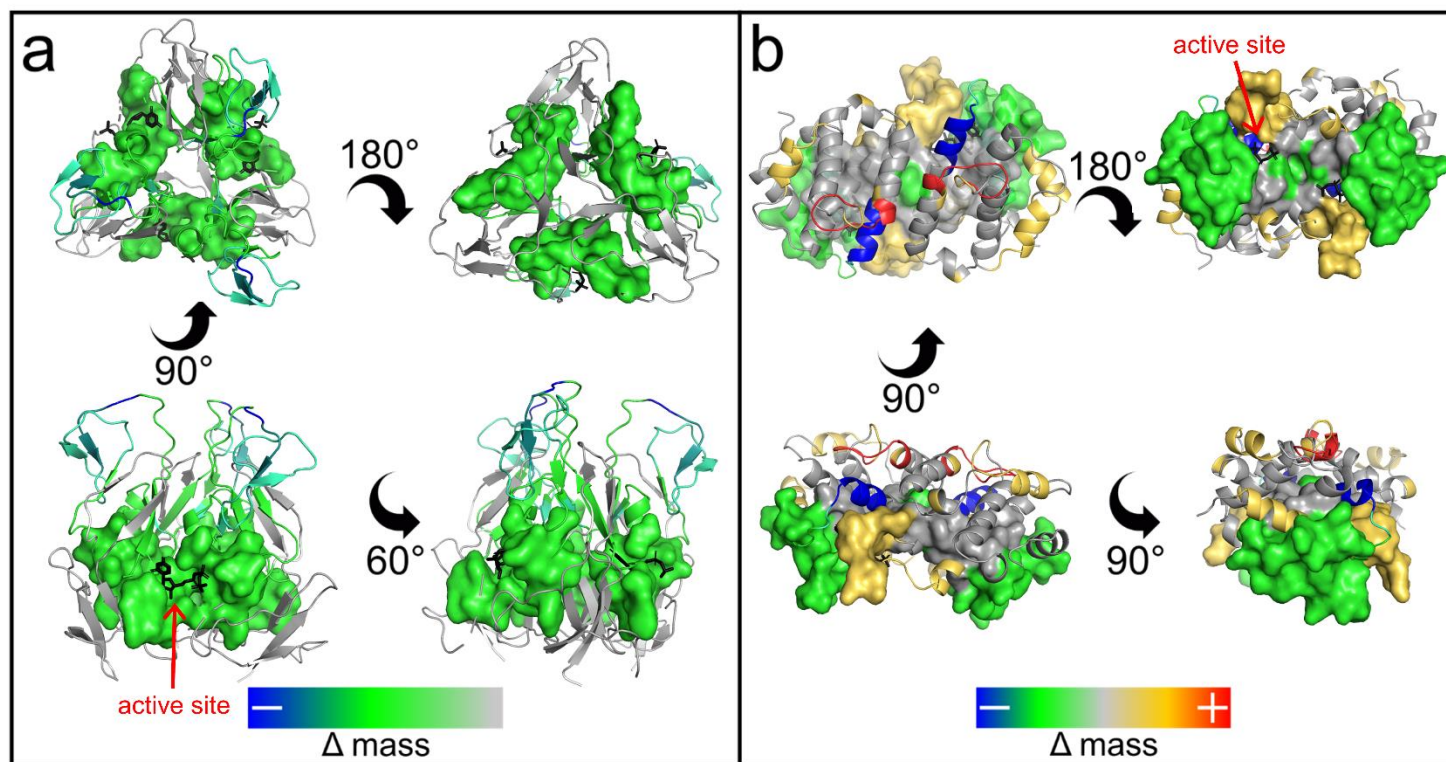

**Figure S3** Active sites of DUT $\phi$ 11 and DUT $\phi$ NM1 colored according to HDX-MS difference data obtained upon complex formation of those with StI protein. (a) X-ray crystal structure (PDB ID 4GV8 [1]) of DUT $\phi$ 11 colored according to HDX-MS difference data following the color gradient shown at the bottom of the panel, surface representation is applied for active site residues (cf. boxed residues on Figure 3c of the main text) while other parts of the protein are shown as cartoon. Substrate analogue dUPNPP is also shown as black sticks in order to ease visualization of the active sites. (Views: top, bottom, sides.) (b) Homology model of DUT $\phi$ NM1 colored according to HDX-MS difference data following the color gradient shown at the bottom of the panel, surface representation is applied for active site residues (cf. boxed residues on Figure 4c of the main text) while other parts of the protein are shown as cartoon. Substrate analogue dUPNPP is also shown as black sticks in order to ease visualization of the active sites. (Views: top, bottom, sides.)

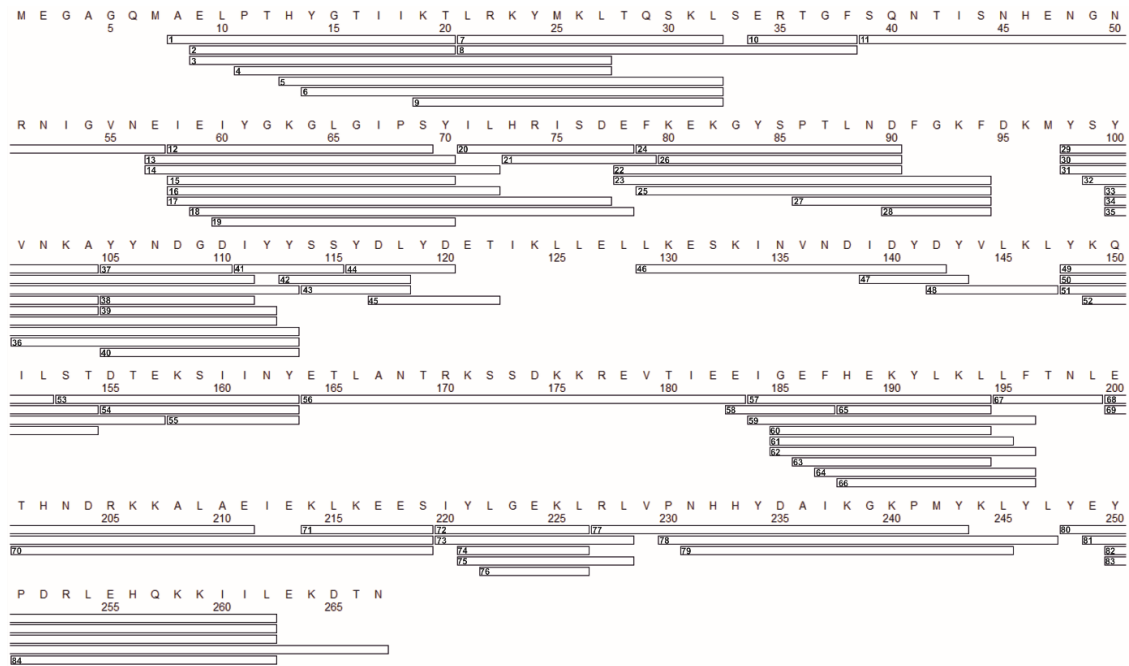

(a)

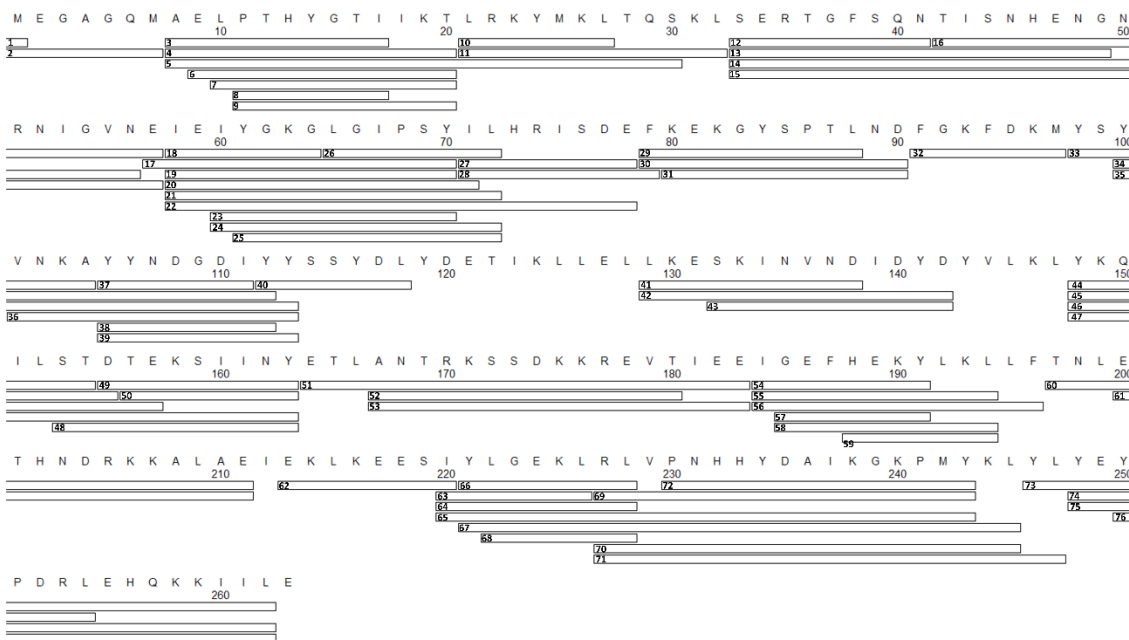

(b)

**Figure S4.** Coverage map of HDX-MS difference plots for Stl upon complex formation with DUT $\phi$ 11 and DUT $\phi$ 11 $\Delta$ insert. (a) Coverage map describing the distribution of 84 individual peptides (horizontal bars) covering 94.0% of the Stl sequence with redundancy of 3.8 in the presence of DUT $\phi$ 11. (b) Coverage map describing the distribution of 76 individual peptides (horizontal bars) covering 93.7% of the Stl sequence with redundancy of 3.7 in the presence of DUT $\phi$ 11 $\Delta$ insert.

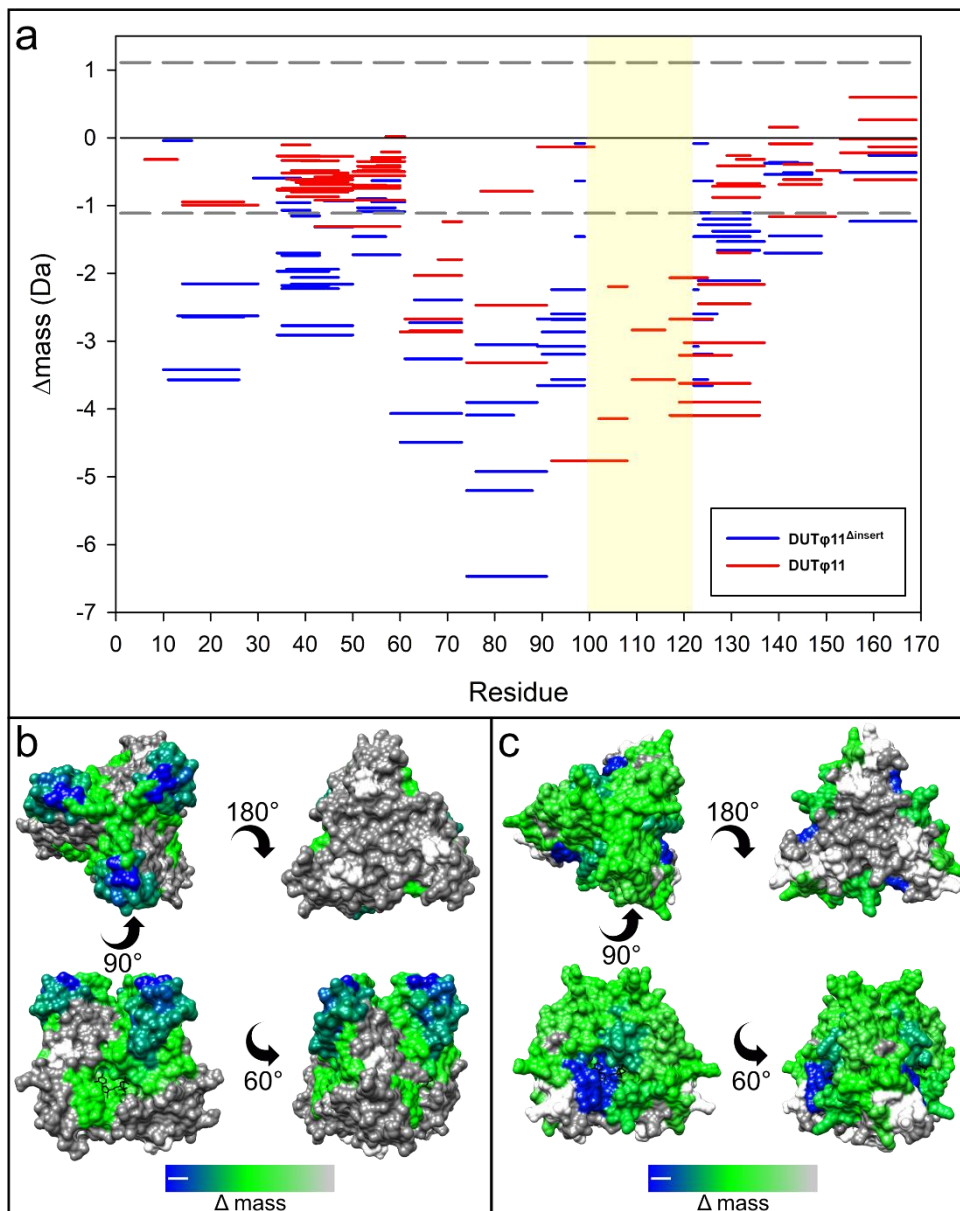

**Figure S5.** HDX-MS difference data obtained for DUT $\phi$ 11 and DUT $\phi$ 11 $\Delta\text{insert}$  upon complex formation with StI. (a) Difference plots of DUT $\phi$ 11 and DUT $\phi$ 11 $\Delta\text{insert}$  upon complex formation with StI. HDX difference plots the mass change ( $\Delta\text{mass}$ ) of each individual peptide of dUTPases upon mixing with StI. The dashed line represents the 99% confidence bands evaluated over the whole dataset. Numbering of residues in DUT $\phi$ 11 $\Delta\text{insert}$  follow that of DUT $\phi$ 11, yellow background highlights the deleted segment. Representation of the HDX-MS difference data on the surface of the DUT $\phi$ 11 (b) and DUT $\phi$ 11 $\Delta\text{insert}$  (c). In case of DUT $\phi$ 11 the experimentally determined structure is shown (PDB ID: 4GV8), note that the position of the C-terminal 15 residues was not resolved in the crystal structure possibly due to flexibility. A three-dimensional structural model generated by SWISS-MODEL [2] is displayed for the truncated mutant. The substrate analogue is shown as black sticks in order to ease visualization of the interference of StI and substrate binding. The coloring is according to the scale at the bottom of the panels. (Views: sides, top, bottom.) Regions which could not be probed by HDX-MS are shown in white.

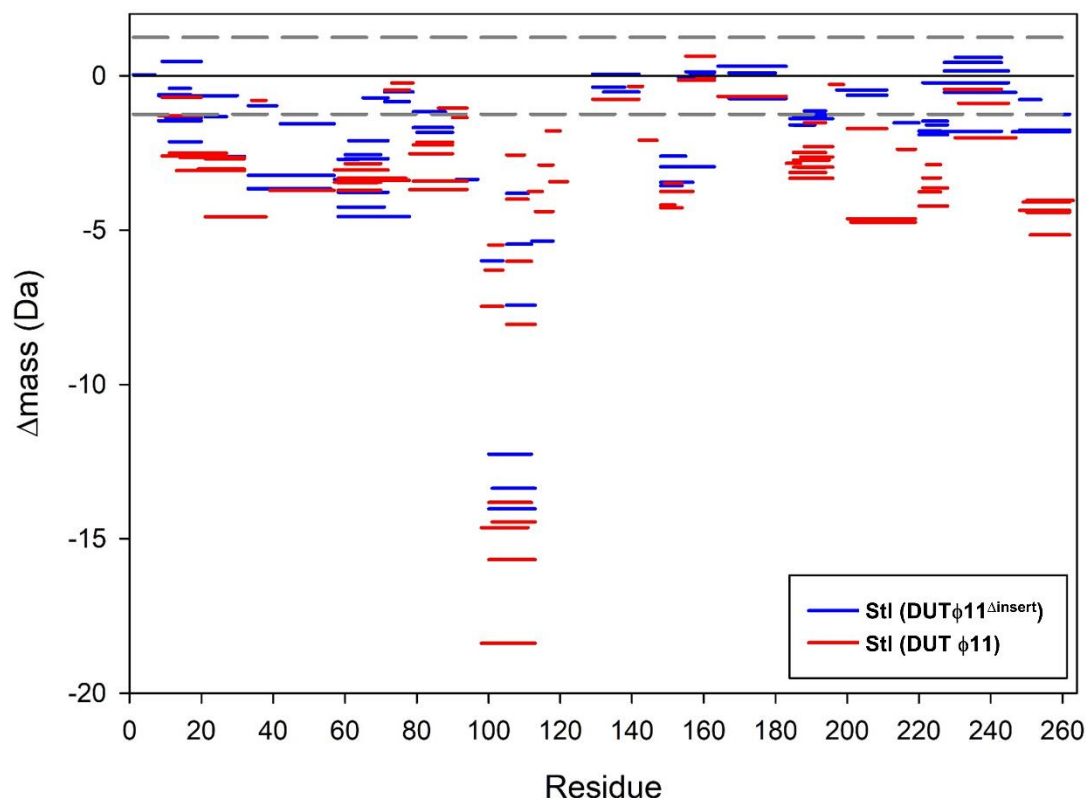

**Figure S6.** HDX-MS difference data obtained for StI upon complex formation with DUT $\phi$ 11 and DUT $\phi$ 11 $\Delta$ insert. HDX difference plots the mass change ( $\Delta$ mass) of each individual peptide of StI upon mixing with DUT $\phi$ 11 (red) and DUT $\phi$ 11 $\Delta$ insert (blue). The dashed line represents the 95% confidence bands evaluated over the whole dataset.

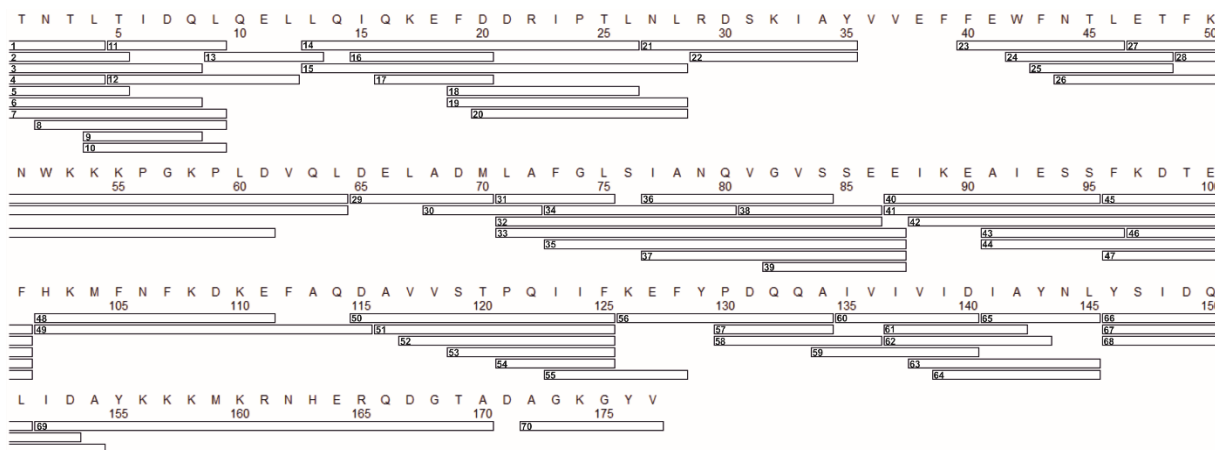

**Figure S7.** Coverage map of HDX-MS difference plots for DUT $\phi$ NM1 upon complex formation with StI. Coverage map describing the distribution of 70 individual peptides (horizontal bars) covering 97.3% of the DUT $\phi$ NM1 with redundancy of 3.5 in the presence of StI. (DUT $\phi$ NM1 denotes residues 2-178 of  $\phi$ NM1 phage dUTPase, Uniprot ID: A0EWK2)

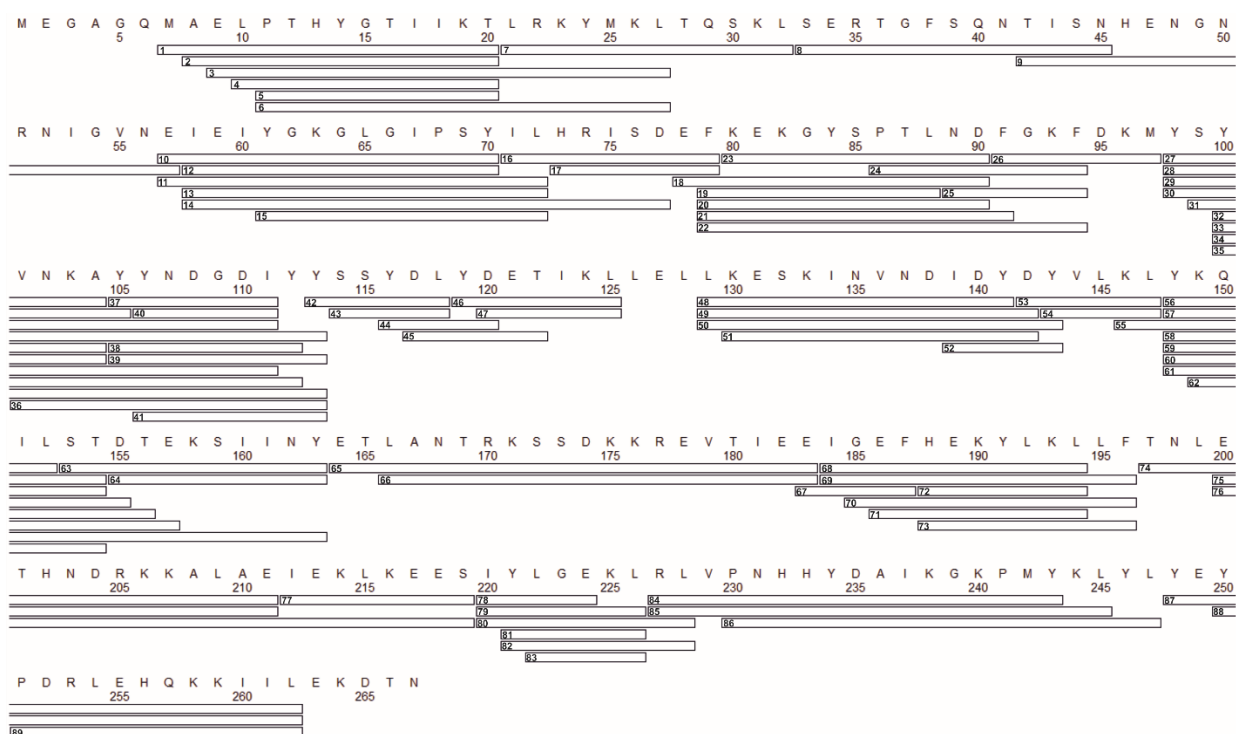

**Figure S8.** Coverage map of HDX-MS difference plots for Stl upon complex formation with DUT $\phi$ NM1. Coverage map describing the distribution of 89 individual peptides (horizontal bars) covering 94.8% of the Stl sequence with redundancy of 3.8 in the presence of DUT $\phi$ NM1.

```

φ11      MTNTLQVRLLEN-----ARMPERNHKT-----AGYDIFSAETVVLEPQEKAVIK
φNM1     MTNTLTIDQLQELLQIQKEFDDRIPTLNLRDSKIAYVVEFFEFWNTLETTFKNWKKKPGKP
          ***** : *.*          *:* * : .          ::*.: .. : :*.

φ11      TDVAVSIPEGYVGL---LTSRSRGVSS-KTHLVIETGKIDAGYHGNLGIN---IKNDIAS
φNM1     LDVQLDELADMLAFGLSIANQVGVSSEEIKEAIESSFKDTEFHKMFNFKDKEFAQDAVVS
          ** :. . :.: :.: ***** : :.*.: * : * :.: : : : : : : :*.

φ11      NGYITPGVFDIKGEIDLSDAIRQYGTYQINEGDKLAQLVIVPIWTPELKQVEEFESVSER
φNM1     TPQIIFKEFYPDQQAIVIVIDIAYNLYSIDQ-----LID-AYKKMKRNHERQDGTAD
          . * * . : : * . * . * : : * : . : : * : * . : .

φ11      GEKFGSSGV
φNM1     AGKGYV----
          . ** :
    
```

**Figure S9.** Sequence alignment of  $\phi$ 11 phage trimeric dUTPase and  $\phi$ NM1 phage dimeric dUTPase generated by NPS@ server [3]. Conserved motifs are with bold. Identical residues denoted with stars (\*) strongly similar residues denoted with colons (:), weakly similar residues denoted with dots (.). Identical peptide segments between the two dUTPases of different classes are underlined (cf. also [4]).



## Supplementary Tables

**Table S1. Sequences of protein constructs used.** Residues in blue belong to the linkers and tags used in the cloning and expression / purification of the proteins. Numbering of the first residue of a particular construct is indicated by the number in brackets and relates to the biologically occurring protein (encoded in *Staphylococcus* and its phages). In the case of the insert-deleted mutant (DUT $\phi$ 11 $\Delta$ insert), the same first residue is indicated as for the wild type protein.

| Name                          | Molar extinction coefficient at 280 nm (M <sup>-1</sup> cm <sup>-1</sup> ) | Sequence                                                                                                                                                                                                                                                                                                                                                    |
|-------------------------------|----------------------------------------------------------------------------|-------------------------------------------------------------------------------------------------------------------------------------------------------------------------------------------------------------------------------------------------------------------------------------------------------------------------------------------------------------|
| DUT $\phi$ NM1                | 19940                                                                      | <b>GSMAS</b> [ 2 ] TNTLTIDQLQELLQIQKEFDDRIPTLNLRDSKIAY VVEFFWFNTLETFFKNWKKKPGKPLDVQLDELADMLAFGLSIA NQVGVSSEEIKEAIESSFKDTEFHKMFNFKDKEFAQDAVVSTP QIIIFKEFYPDQQAIVIVIDIAYNLYSIDQLIDAYKKMKRNHE RQDGTADAGKGYV                                                                                                                                                    |
| DUT $\phi$ 11                 | 14440                                                                      | <b>MGSSHHHHHSSGLVPRGSH</b> [ 1 ] MTNTLQVRLLENARMPEH HKT D A G Y D I F S A E T V V L E P Q E K A V I K T D V A V S I P E G Y V G L L T S R S G V S S K T H L V I E T G K I D A G Y H G N L G I N I K N D A I A S N G Y I T P G V F D I K G E I D L S D A I R Q Y G T Y Q I N E G D K L A Q L V I V P I W T P E L K Q V E E F E S V S E R G E K G F G S S G V |
| DUT $\phi$ 11 $\Delta$ insert | 12950                                                                      | [ 1 ] MTNTLQVRLLENARMPEH HKT D A G Y D I F S A E T V V L E P Q E K A V I K T D V A V S I P E G Y V G L L T S R S G V S S K T H L V I E T G K I D A G Y H G N L G I N I K N D A I A S N G Y I T P G V F D I K G E I D L S D A I R Q Y G T Y Q I N E G D K L A Q L V I V P I W T P E L K Q V E E F E S V S E R G E K G F G S S G V                            |
| StI SaPIbov1                  | 35760                                                                      | <b>GSPEFS</b> [ 1 ] MEGAGQMAELPHTHYGTIIKTLRKYMKLTQSKLSER TGFSQNTISNHENGRNIGVNEIEIYGKGLGIPSYILHRISDEF KEKGYSPTLNDFGKFDKMYSYVNKAYYNDGDIYSSYDLYDETI KLELLKESKINVNDIDYDYLKLYKQILSTDTEKSIINYETLANTRKSSDKKREVTIEEIGEFHEKYLKLLFTNLETHNDRKKALAE IEKLKEESIYLGEKLRVLPNHHYDAIKGKPMYKLYLYEYPDRLE HQKKIILEKDTN                                                           |

## Supplemental References

1. Leveles, I.; Németh, V.; Szabó, J.E.; Harmat, V.; Nyíri, K.; Bendes, A.A.; Papp-Kádár, V.; Zagyva, I.; Róna, G.; Ozohanics, O.; et al. Structure and enzymatic mechanism of a moonlighting dUTPase. *Acta Crystallogr. Sect. D Biol. Crystallogr.* **2013**, *69*, 2298–308.
2. Biasini, M.; Bienert, S.; Waterhouse, A.; Arnold, K.; Studer, G.; Schmidt, T.; Kiefer, F.; Cassarino, T.G.; Bertoni, M.; Bordoli, L.; et al. SWISS-MODEL: modelling protein tertiary and quaternary structure using evolutionary information. *Nucleic Acids Res.* **2014**, *42*, W252–W258.
3. Combet, C.; Blanchet, C.; Geourjon, C.; Deléage, G. NPS@: network protein sequence analysis. *Trends Biochem. Sci.* **2000**, *25*, 147–50.
4. Hill, R.L.L.; Vlach, J.; Parker, L.K.; Christie, G.E.; Saad, J.S.; Dokland, T. Derepression of SaPIbov1 Is Independent of  $\phi$ NM1 Type 2 dUTPase Activity and Is Inhibited by dUTP and dUMP. *J. Mol. Biol.* **2017**, *429*, 1570–1580.

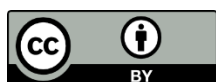

Supplement: biomolecules-09-00488-s001.pdf [file biomolecules-09-00488-s001.pdf]
